# Supplementary material
Source: PubMed Central journal article supplement (PMC3349881)

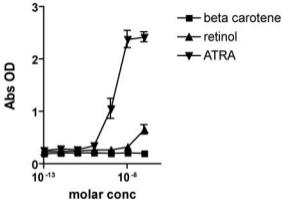

supplemental figure 1

Supplement: mmc1.pdf [file mmc1.pdf]

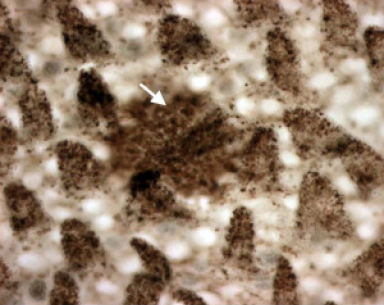

supplemental figure 2

Supplement: mmc2.pdf [file mmc2.pdf]
